# Supplementary material for: Lysine acetylome profiling uncovers novel histone deacetylase substrate proteins in Arabidopsis
Source: PubMed Central journal article supplement (PMC5658702; doi:10.15252/msb.20177819), 2017-10-23
Supplement: MSB-13-949-s001.pdf [file MSB-13-949-s001.pdf]

## APPENDIX

### List of Figures

Appendix Figure S1: Multiscatter plots of light (L) and medium (H)-dimethyl-labeled non-normalized protein intensities from inhibitor experiments.

Appendix Figure S2: Venn Diagrams of overlapping quantified acetylation sites and protein groups.

Appendix Figure S3: Up-regulation of lysine acetylation sites (Kac) on Arabidopsis histone tails (H2A, 2B, H3 and H4) upon 4h of 5  $\mu$ M TSA (blue) and apicidin (red) treatment, respectively.

Appendix Figure S4: Western-blot analysis of HDA14 on isolated chloroplasts and mitochondria.

Appendix Figure S5: Purified recombinant 6xHis- $\Delta$ 45-HDA14 protein.

Appendix Figure S6: Genotyping and Phenotyping of *hda14* line.

A

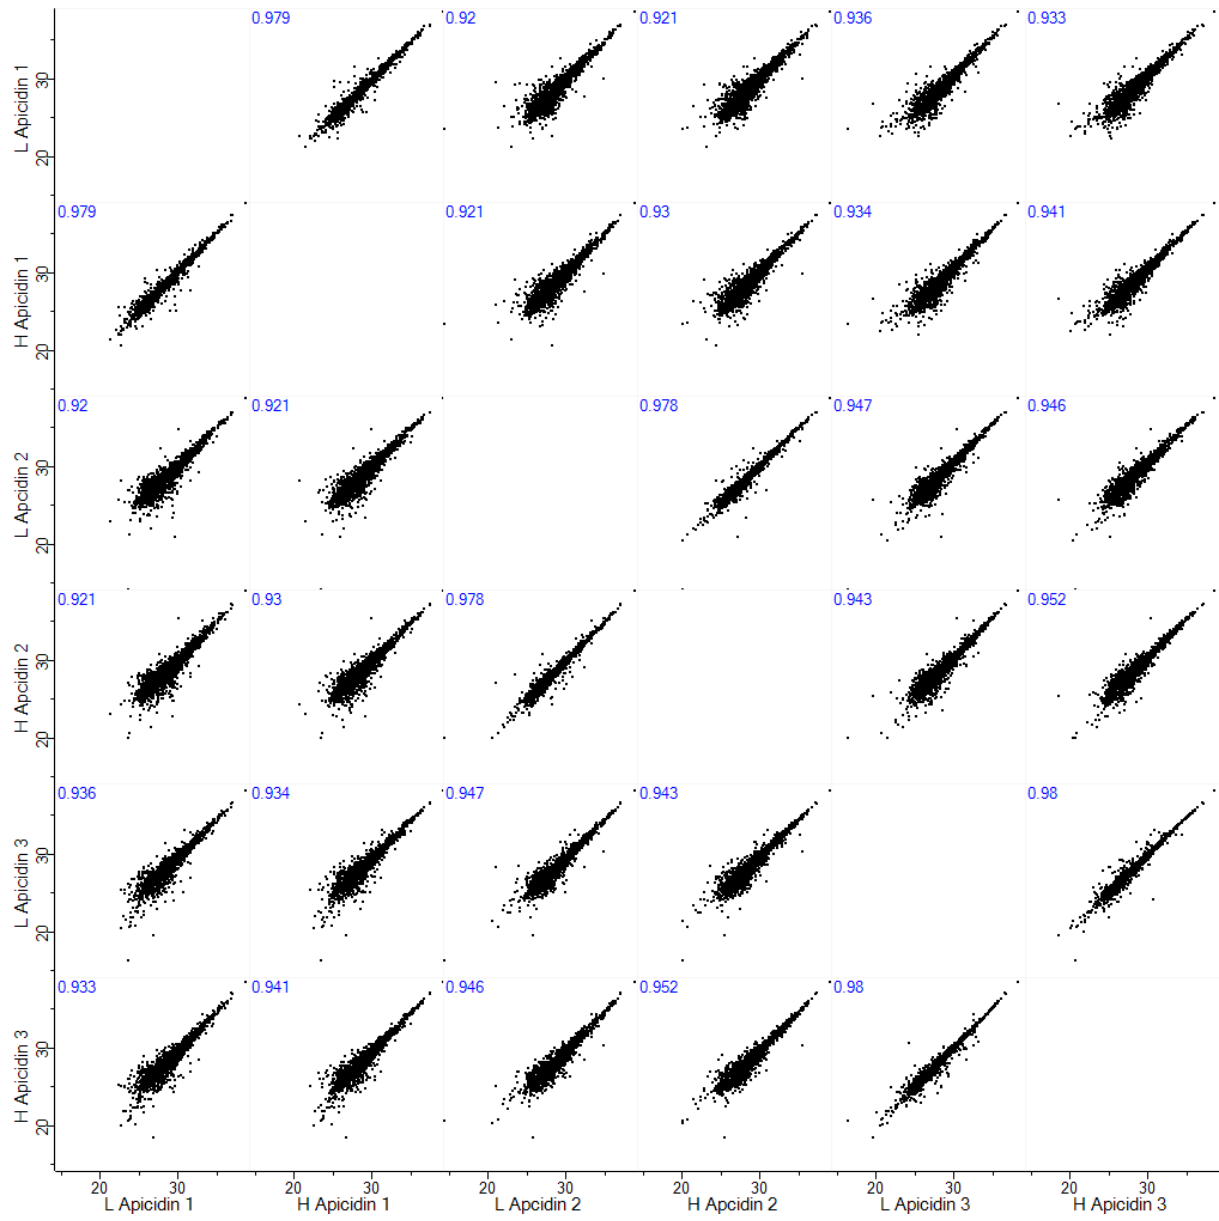

**B**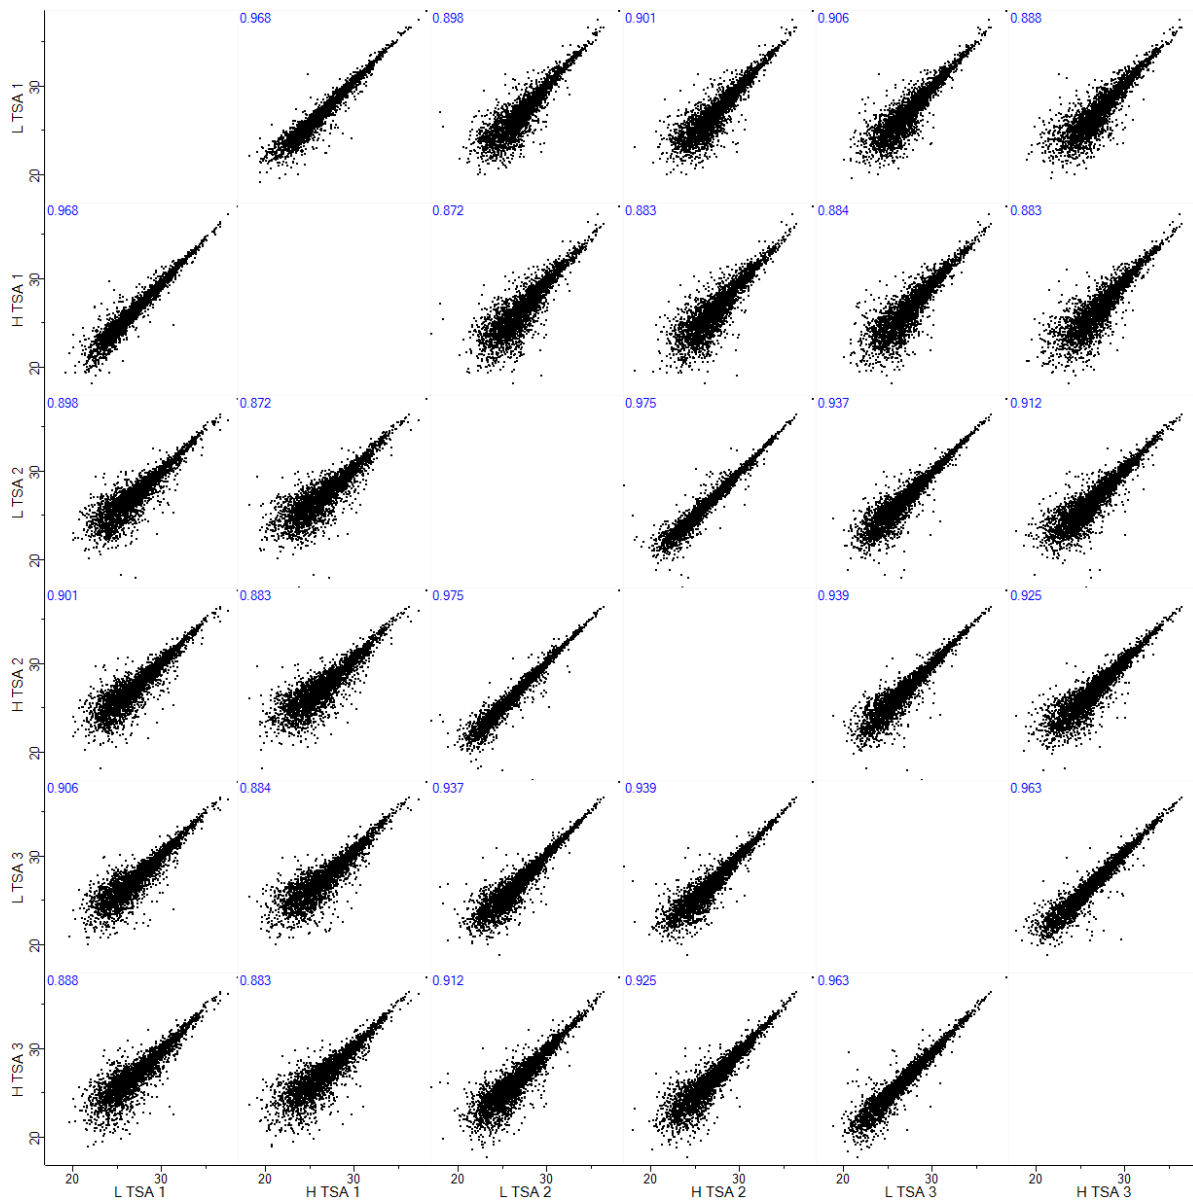

**Appendix Figure S1: Multiscatter plots of light (L) and medium (H)-dimethyl-labeled non-normalized protein intensities from inhibitor experiments. (A) apicidin, (B) TSA (n = 3).**

**A: apicidin**

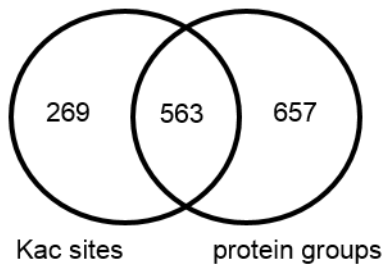

**B: TSA**

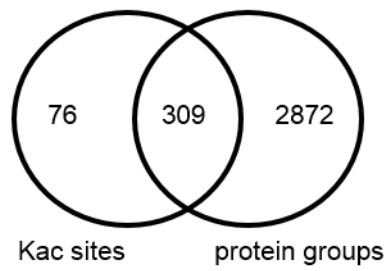

**C: *hda14***

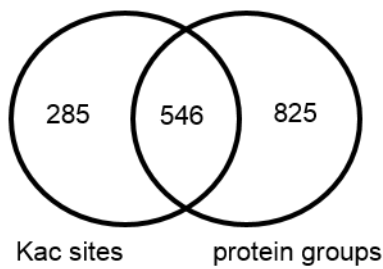

**D: thylakoids**

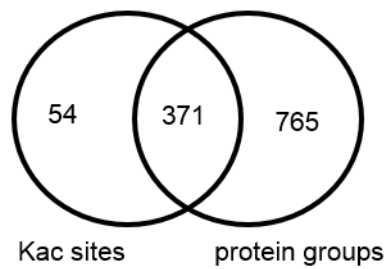

**E: 2h low light**

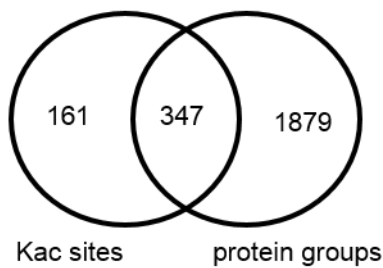

**Appendix Figure S2: Venn Diagrams of overlapping quantified acetylation sites and protein groups.** Experiments A-E refer to the supplementary datasets EV1-5.

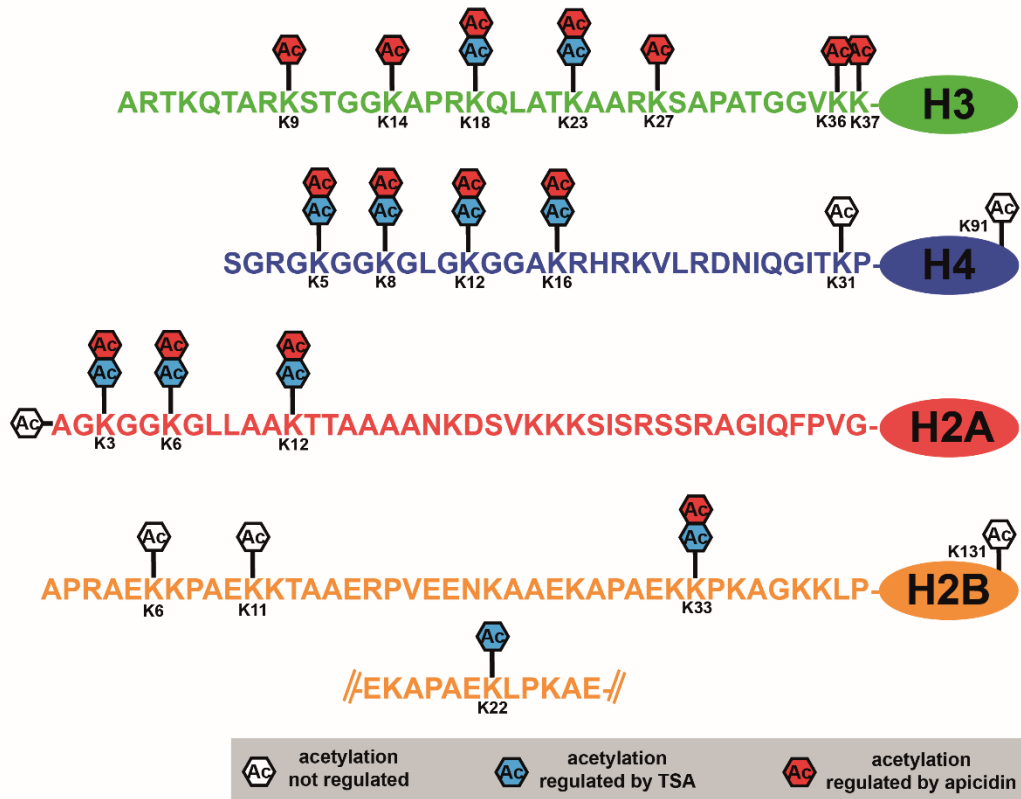

**Appendix Figure S3: Up-regulation of lysine acetylation sites (Kac) on Arabidopsis histone tails (H2A, 2B, H3 and H4) upon 4h of 5  $\mu$ M TSA (blue) and apicidin (red) treatment, respectively.** For details on identifications, see Table EV1a and Table EV2a.

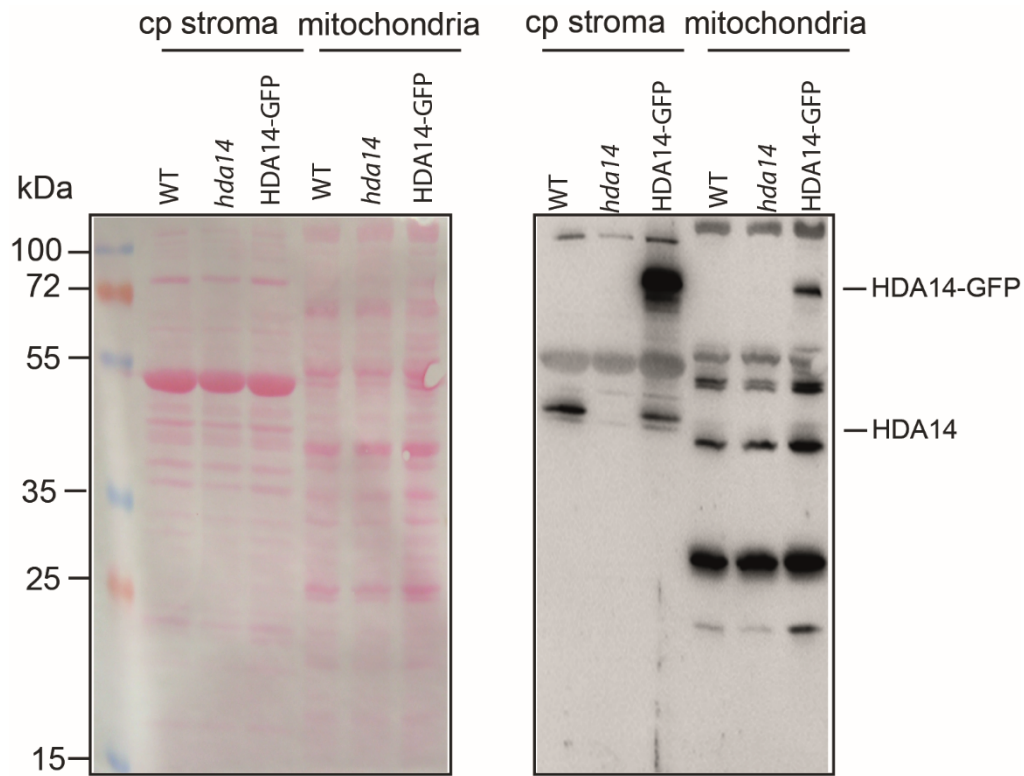

**Appendix Figure S4: Western-blot analysis of HDA14 on isolated chloroplasts and mitochondria.** Ponceau S stain (left) Western blot analysis (right) of chloroplast (cp) stroma and mitochondria isolated from WT, *hda14* and 35S:HDA14:GFP seedlings. The endogenous HDA14 and HDA14-GFP fusion proteins are indicated. No HDA14 protein was detected in *hda14* seedlings.

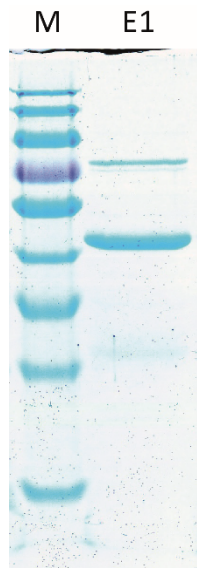

**Appendix Figure S5: Purified recombinant 6xHis- $\Delta$ 45-HDA14 protein.** M: Marker, E1: elution fraction 1.

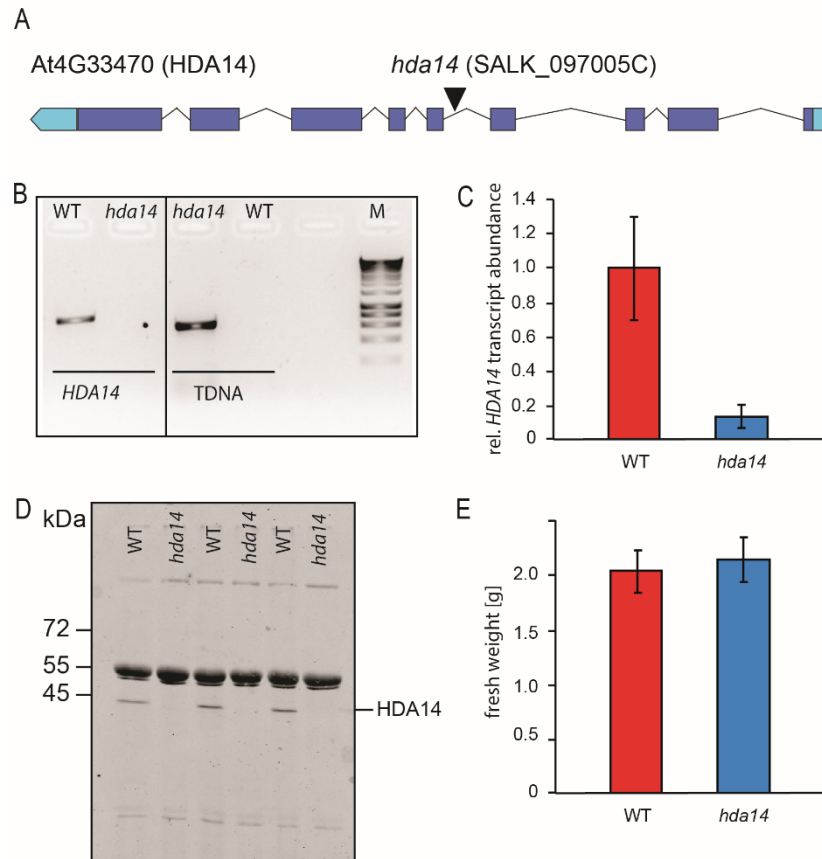

**Appendix Figure S6: Genotyping and phenotyping of *hda14* line.** (A) Scheme of the HDA14 gene with the TDNA insertion. (B) PCR with genomic DNA from WT and *hda14* with primers (HDA14\_RP and HDA14\_LP) which compose the TDNA insertion site (*HDA14*) and primers flanking the left border of the TDNA (SALK-Lb1.3) and gene specific HDA14\_RP primers (TDNA). (C) qPCR with cDNA from WT and *hda14* using *HDA14* gene-specific primers. *Actin 2* primers were used as reference, (n = 3, mean  $\pm$ SD). For primers see materials and methods. (D) Western blot analysis with WT and *hda14* protein extracts (n = 3) using an antiserum raised against HDA14 protein (Tran et al., 2012). (E) Fresh weight of 5-week old WT and *hda14* plants (n = 21-27, mean  $\pm$ SD).
